# Supplementary material for: Variation and attribution of probable maximum precipitation of China using high-resolution dataset in a changing climate
Source: Copernicus journal article supplement (doi:10.5194/hess-2023-265), 2023-12-14
Supplement: Supplementary file 1 [file hess-2023-265-supplement.pdf]

*Supplement of*

## **Variation and attribution of probable maximum precipitation in China in a changing climate**

Jinghua Xiong et al.

*Correspondence to:* Shenglian Guo (slguo@whu.edu.cn)

The copyright of individual parts of the supplement might differ from the article license.

Table S1. Specific dates and reasons for extremely high precipitation higher than the 99.9% of observations (327 mm/d) in China during 1951-2019 from the HRLT precipitation dataset.

| Dates      | No. days of the year | Reason                           |
|------------|----------------------|----------------------------------|
| 1963/9/8   | 251                  | Extreme precipitation event      |
| 1975/8/7   | 219                  | Extreme precipitation event      |
| 1977/7/21  | 202                  | Extreme precipitation event      |
| 1996/9/21  | 265                  | Extreme precipitation event      |
| 1999/10/9  | 282                  | Extreme precipitation event      |
| 2001/8/30  | 242                  | Extreme precipitation event      |
| 2005/7/19  | 200                  | Extreme precipitation event      |
| 2005/9/3   | 246                  | Extreme precipitation event      |
| 2015/11/14 | 318                  | Bias in raw precipitation record |
| 2015/11/23 | 327                  | Bias in raw precipitation record |
| 2015/12/7  | 341                  | Bias in raw precipitation record |
| 2016/3/22  | 82                   | Bias in raw precipitation record |
| 2016/3/29  | 89                   | Bias in raw precipitation record |
| 2016/5/1   | 122                  | Bias in raw precipitation record |
| 2016/5/5   | 126                  | Bias in raw precipitation record |
| 2016/5/6   | 127                  | Bias in raw precipitation record |
| 2016/5/12  | 133                  | Bias in raw precipitation record |
| 2016/5/13  | 134                  | Bias in raw precipitation record |
| 2016/5/14  | 135                  | Bias in raw precipitation record |
| 2016/5/18  | 139                  | Bias in raw precipitation record |
| 2016/5/20  | 141                  | Bias in raw precipitation record |
| 2016/5/22  | 143                  | Bias in raw precipitation record |
| 2016/6/15  | 167                  | Bias in raw precipitation record |
| 2016/6/21  | 173                  | Bias in raw precipitation record |
| 2016/7/17  | 199                  | Bias in raw precipitation record |
| 2016/7/19  | 201                  | Bias in raw precipitation record |
| 2016/7/22  | 204                  | Bias in raw precipitation record |
| 2016/7/24  | 206                  | Bias in raw precipitation record |
| 2016/8/18  | 231                  | Extreme precipitation event      |
| 2016/9/29  | 273                  | Extreme precipitation event      |
| 2019/6/2   | 153                  | Bias in raw precipitation record |
| 2019/8/11  | 223                  | Extreme precipitation event      |

Table S2. Data availability of different variables in different models. A tick ‘√’ (cross ‘×’) symbol means the data is (not) available currently. ‘hfls’ is the surface upward latent heat flux [W m<sup>-2</sup>], ‘hfss’ is the surface upward sensible heat flux [W m<sup>-2</sup>], ‘pr’ is the precipitation [kg m<sup>-2</sup> s<sup>-1</sup>], ‘tasmx’ is the daily maximum near-surface air temperature [K]. Refer to main text for the meaning of other abbreviations.

| Experiment | Scenario                   | Variable | CM<br>CC-<br>ESM<br>2 | CNRM-<br>CM6-1 | EC-<br>Earth3 | IPSL-<br>CM6A-LR | MIRO<br>C6 | MPI-<br>ESM1-2-<br>LR |
|------------|----------------------------|----------|-----------------------|----------------|---------------|------------------|------------|-----------------------|
| CMIP       | historical                 | hfls     | √                     | √              | √             | √                | √          | √                     |
|            |                            | hfss     | √                     | √              | √             | √                | √          | √                     |
|            |                            | pr       | √                     | √              | √             | √                | √          | √                     |
| SMIP       | SSP126                     | hfls     | √                     | √              | √             | √                | √          | √                     |
|            |                            | hfss     | √                     | √              | √             | √                | √          | √                     |
|            |                            | pr       | √                     | √              | √             | √                | √          | √                     |
|            | SSP585                     | hfls     | √                     | √              | √             | √                | √          | √                     |
|            |                            | hfss     | √                     | √              | √             | √                | √          | √                     |
|            |                            | pr       | √                     | √              | √             | √                | √          | √                     |
| LS3MI<br>P | lfmip-<br>pdLC<br>(SSP126) | hfls     | ×                     | ×              | √             | √                | ×          | √                     |
|            |                            | hfss     | ×                     | ×              | √             | √                | √          | √                     |
|            |                            | pr       | √                     | ×              | √             | √                | √          | √                     |
|            | lfmip-<br>pdLC<br>(SSP585) | hfls     | ×                     | ×              | √             | √                | ×          | √                     |
|            |                            | hfss     | ×                     | ×              | √             | √                | √          | √                     |
|            |                            | pr       | √                     | √              | √             | √                | √          | √                     |

Table S3. Detailed information of daily precipitation estimations of major Chinese water conservancy projects and their catchment area (GIWCHPD, 1982, 1990). Subset I and II mean the completion of version one (published in 1982) and two (published in 1990), respectively.

| Source    | ID | Name                      | PMP (mm) | Drainage area (km <sup>2</sup> ) |
|-----------|----|---------------------------|----------|----------------------------------|
| Subset I  | 8  | Tankeng                   | 522      | 30,200                           |
| Subset I  | 22 | Pankou                    | 213      | 8,950                            |
| Subset I  | 27 | Daguangba                 | 880      | 3,498                            |
| Subset I  | 33 | Baozhusi                  | 246      | 28,428                           |
| Subset I  | 53 | Zhikong                   | 45       | 20,179                           |
| Subset II | 10 | Zhuzhuang                 | 761      | 1,220                            |
| Subset II | 12 | Kundulun                  | 280      | 2,581                            |
| Subset II | 22 | Erlongshan                | 380      | 3,796                            |
| Subset II | 23 | Xinlicheng                | 400      | 1,970                            |
| Subset II | 24 | Shitoukoumen              | 267      | 4,944                            |
| Subset II | 29 | Longfengshan              | 403      | 1,740                            |
| Subset II | 30 | Hunanzhen                 | 473      | 2,151                            |
| Subset II | 31 | Huangtankou               | 473      | 2,388                            |
| Subset II | 32 | Xinjiang                  | 330      | 10,442                           |
| Subset II | 33 | Fuchunjiang               | 223      | 31,645                           |
| Subset II | 34 | Tingxia                   | 1010     | 176                              |
| Subset II | 35 | Jinshuitan                | 450      | 2,761                            |
| Subset II | 36 | Longhekou                 | 680      | 1,120                            |
| Subset II | 37 | Chitan                    | 315      | 4,766                            |
| Subset II | 38 | Gutian-I                  | 406      | 1,325                            |
| Subset II | 40 | Shanmei                   | 810      | 1,023                            |
| Subset II | 41 | Tuolin                    | 388      | 9,340                            |
| Subset II | 44 | Wuhushan                  | 728      | 557                              |
| Subset II | 45 | Taihe                     | 707      | 780                              |
| Subset II | 46 | Xiashan                   | 593      | 4,210                            |
| Subset II | 49 | Yahekou                   | 577      | 3,030                            |
| Subset II | 50 | Banqiao                   | 928      | 762                              |
| Subset II | 57 | Xiongnu                   | 782      | 1,015                            |
| Subset II | 58 | Lushui                    | 306      | 3,400                            |
| Subset II | 60 | Fushui                    | 565      | 2,450                            |
| Subset II | 62 | Wuqiangxi                 | 121      | 83,800                           |
| Subset II | 66 | Fengshuba                 | 337      | 5,150                            |
| Subset II | 67 | Xinfengjiang              | 325      | 5,740                            |
| Subset II | 69 | Liuxihe                   | 540      | 539                              |
| Subset II | 70 | Tiantangshan              | 666      | 461                              |
| Subset II | 71 | Songtao                   | 900      | 1,440                            |
| Subset II | 73 | Chengbihe                 | 897      | 2,000                            |
| Subset II | 82 | Tongjiezi                 | 110      | 86,420                           |
| Subset II | 83 | Bikou                     | 191      | 26,000                           |
| Subset II | 85 | Shengzhong                | 590      | 1,756                            |
| Subset II | 87 | Longxihe-I<br>(Shizitan)  | 370      | 3,020                            |
| Subset II | 91 | Tianshengqiao             | 110      | 50,194                           |
| Subset II | 92 | Maotiaohe-I<br>(Hongfeng) | 386      | 1,596                            |
| Subset II | 93 | Maotiaohe-II<br>(Baihua)  | 370      | 1,895                            |

---

|           |     |           |     |        |
|-----------|-----|-----------|-----|--------|
| Subset II | 98  | Wujiangdu | 131 | 27,800 |
| Subset II | 108 | Lubuge    | 324 | 7,283  |
| Subset II | 110 | Wangyao   | 265 | 820    |
| Subset II | 111 | Shitouhe  | 310 | 673    |
| Subset II | 112 | Shibianyu | 420 | 132    |
| Subset II | 114 | Shiquan   | 137 | 23,400 |
| Subset II | 115 | Ankang    | 140 | 35,700 |
| Subset II | 122 | Bajiazui  | 163 | 3,522  |

---

Table S4. Detailed information on the historical maximum precipitation over China (Wang, 2002).

| Longitude | Latitude | Precipitation (mm) | Longitude | Latitude | Precipitation (mm) |
|-----------|----------|--------------------|-----------|----------|--------------------|
| 112.33    | 16.83    | 642.0              | 118.80    | 32.00    | 134.7              |
| 108.87    | 18.75    | 962.2              | 120.15    | 32.52    | 205.4              |
| 109.63    | 19.20    | 642.6              | 121.15    | 32.30    | 822.0              |
| 109.38    | 19.18    | 632.0              | 92.07     | 33.62    | 69.6               |
| 110.28    | 19.05    | 516.0              | 101.70    | 33.78    | 98.2               |
| 109.78    | 20.95    | 694.4              | 101.48    | 33.43    | 43.2               |
| 107.9     | 21.58    | 657.5              | 107.08    | 33.33    | 500.0              |
| 107.65    | 21.68    | 641.7              | 108.83    | 33.30    | 310.8              |
| 108.00    | 21.78    | 452.0              | 108.32    | 33.75    | 327.5              |
| 110.68    | 21.37    | 794.0              | 110.40    | 33.72    | 1300.0             |
| 111.38    | 21.82    | 858.0              | 112.67    | 33.62    | 479.0              |
| 111.80    | 21.95    | 785.0              | 112.00    | 33.22    | 167.8              |
| 111.53    | 21.80    | 738.0              | 113.38    | 33.02    | 586.0              |
| 112.43    | 21.87    | 851.0              | 113.65    | 33.05    | 1060.3             |
| 112.72    | 21.95    | 674.0              | 113.32    | 33.38    | 334.0              |
| 99.43     | 22.78    | 197.9              | 115.35    | 33.27    | 470.8              |
| 101.02    | 22.58    | 312.9              | 118.08    | 33.65    | 553.6              |
| 102.25    | 22.82    | 113.1              | 120.55    | 33.45    | 672.6              |
| 104.77    | 22.95    | 240.4              | 98.13     | 34.95    | 59.6.0             |
| 108.85    | 22.10    | 564.4              | 104.67    | 34.85    | 440.0              |
| 109.10    | 22.23    | 643.5              | 107.05    | 34.28    | 126.1              |
| 112.48    | 22.30    | 656.0              | 108.05    | 34.72    | 146.0              |
| 113.92    | 22.27    | 643.5              | 108.22    | 34.05    | 90.1               |
| 115.67    | 22.98    | 884.0              | 108.53    | 34.02    | 262.1              |
| 99.62     | 23.73    | 78.1               | 109.62    | 34.27    | 345.0              |
| 101.30    | 23.63    | 137.7              | 111.92    | 34.82    | 650.0              |
| 104.58    | 23.38    | 177.9              | 112.18    | 34.32    | 734.3              |
| 106.95    | 23.97    | 385.8              | 115.05    | 34.60    | 451.5              |
| 106.67    | 23.07    | 302.0              | 116.82    | 34.77    | 230.0              |
| 109.67    | 23.30    | 617.0              | 119.37    | 34.75    | 599.1              |
| 111.30    | 23.48    | 82.0               | 119.57    | 34.20    | 825.0              |
| 113.02    | 23.72    | 646.7              | 93.38     | 35.37    | 60.1               |
| 113.52    | 23.27    | 211.0              | 103.85    | 35.45    | 401.0              |
| 113.22    | 23.67    | 939.3              | 105.97    | 35.55    | 255.0              |
| 114.25    | 23.33    | 432.0              | 108.38    | 35.22    | 298.0              |
| 114.95    | 23.03    | 670.3              | 113.67    | 35.80    | 484.0              |
| 114.97    | 23.33    | 145.7              | 113.67    | 35.87    | 771.5              |
| 115.75    | 23.05    | 915.6              | 114.22    | 35.32    | 530.0              |
| 115.42    | 23.32    | 491.0              | 118.13    | 35.22    | 537.0              |
| 115.72    | 23.22    | 494.0              | 119.40    | 35.97    | 599.6              |
| 115.88    | 23.63    | 786.2              | 81.47     | 36.47    | 52.6               |
| 116.37    | 23.78    | 630.0              | 94.90     | 36.42    | 35.2               |
| 116.85    | 23.45    | 756.1              | 99.07     | 36.78    | 79.6               |
| 120.58    | 23.70    | 1001.1             | 102.77    | 36.22    | 142.5              |
| 120.73    | 23.52    | 1748.5             | 108.32    | 36.98    | 356.0              |
| 97.70     | 24.75    | 285.7              | 109.17    | 36.80    | 400.0              |

|        |       |        |        |       |        |
|--------|-------|--------|--------|-------|--------|
| 98.58  | 24.48 | 195.7  | 111.35 | 36.43 | 457.2  |
| 106.63 | 24.08 | 61.3   | 113.72 | 36.17 | 483.5  |
| 109.97 | 24.98 | 300.0  | 119.08 | 36.12 | 498.6  |
| 112.17 | 24.33 | 298.1  | 120.68 | 36.93 | 740.0  |
| 115.65 | 24.95 | 283.3  | 120.57 | 36.27 | 536.0  |
| 118.27 | 24.85 | 592.6  | 76.32  | 37.80 | 92.3   |
| 118.58 | 24.63 | 632.5  | 95.50  | 37.72 | 29.7   |
| 121.22 | 24.55 | 1248.2 | 97.45  | 37.38 | 84.0   |
| 121.75 | 24.62 | 1672.6 | 101.58 | 37.00 | 240.0  |
| 100.22 | 25.52 | 91.0   | 103.07 | 37.62 | 228.0  |
| 102.72 | 25.03 | 256.7  | 103.20 | 37.38 | 472.0  |
| 105.38 | 25.85 | 253.4  | 107.22 | 37.77 | 448.0  |
| 109.18 | 25.37 | 779.1  | 110.05 | 37.08 | 85.0   |
| 109.38 | 25.22 | 355.0  | 110.88 | 37.30 | 422.5  |
| 110.4  | 25.72 | 290.6  | 112.17 | 37.82 | 57.3   |
| 113.17 | 25.75 | 461.1  | 114.22 | 37.37 | 950.0  |
| 113.03 | 25.8  | 295.3  | 114.10 | 37.20 | 589.8  |
| 114.7  | 25.42 | 147.5  | 116.92 | 37.03 | 466.2  |
| 116.95 | 25.6  | 491.1  | 116.12 | 37.38 | 643.0  |
| 116.07 | 25.77 | 379.4  | 121.77 | 37.33 | 308.3  |
| 118.83 | 25.53 | 571.5  | 77.27  | 38.43 | 43.5   |
| 119.57 | 25.47 | 737.7  | 85.55  | 38.15 | 42.9   |
| 101.73 | 26.68 | 275.8  | 102.38 | 38.58 | 232.0  |
| 104.62 | 26.78 | 333.5  | 105.90 | 38.77 | 212.5  |
| 106.67 | 26.48 | 415.8  | 105.93 | 38.62 | 202.7  |
| 108.42 | 26.40 | 327.6  | 109.4  | 38.92 | 1400.0 |
| 108.67 | 26.25 | 441.5  | 110.68 | 38.63 | 408.7  |
| 111.60 | 26.27 | 201.9  | 111.68 | 38.82 | 122.2  |
| 112.03 | 26.07 | 347.2  | 113.77 | 38.20 | 385.0  |
| 113.92 | 26.78 | 344.9  | 115.05 | 38.97 | 762.0  |
| 114.50 | 26.08 | 304.9  | 117.53 | 38.67 | 539.9  |
| 115.08 | 26.50 | 420.0  | 75.35  | 39.58 | 70.0   |
| 116.30 | 26.33 | 130.2  | 88.17  | 39.03 | 73.5   |
| 116.80 | 26.35 | 252.9  | 94.27  | 39.40 | 123.3  |
| 117.35 | 26.33 | 294.9  | 97.55  | 39.80 | 88.5   |
| 89.13  | 27.73 | 120.6  | 98.82  | 39.35 | 66.1   |
| 98.65  | 27.77 | 116.4  | 116.47 | 39.95 | 609.0  |
| 101.13 | 27.32 | 227.8  | 117.40 | 39.77 | 462.5  |
| 104.03 | 27.65 | 235.4  | 117.18 | 39.88 | 543.7  |
| 107.75 | 27.93 | 301.3  | 117.38 | 39.90 | 476.2  |
| 110.55 | 27.77 | 291.0  | 122.30 | 39.95 | 684.3  |
| 113.93 | 27.27 | 400.0  | 123.38 | 39.90 | 537.1  |
| 117.62 | 27.80 | 526.0  | 84.02  | 40.10 | 28.6   |
| 117.63 | 27.67 | 261.5  | 109.82 | 40.02 | 186.3  |
| 120.2  | 27.57 | 451.1  | 111.68 | 40.82 | 300.0  |
| 120.2  | 27.97 | 512.6  | 111.83 | 40.55 | 520.0  |
| 120.4  | 27.38 | 514.9  | 114.58 | 40.33 | 600.0  |
| 120.28 | 27.28 | 691.5  | 116.22 | 40.22 | 275.0  |

|        |       |       |        |       |        |
|--------|-------|-------|--------|-------|--------|
| 85.97  | 28.18 | 195.5 | 117.70 | 40.37 | 354.0  |
| 97.47  | 28.65 | 120.2 | 117.83 | 40.00 | 521.7  |
| 102.02 | 28.68 | 253.5 | 124.62 | 40.28 | 588.1  |
| 105.43 | 28.95 | 393.8 | 124.62 | 40.28 | 429.1  |
| 108.77 | 28.83 | 141.5 | 124.60 | 40.57 | 511.5  |
| 114.40 | 28.65 | 336.7 | 124.6  | 40.57 | 657.9  |
| 115.33 | 28.92 | 318.6 | 124.57 | 40.62 | 325.0  |
| 116.60 | 28.23 | 493.0 | 80.48  | 41.52 | 87.5   |
| 117.03 | 28.05 | 234.4 | 80.93  | 41.82 | 111.5  |
| 120.90 | 28.25 | 292.0 | 94.67  | 41.53 | 36.3   |
| 120.67 | 28.02 | 411.0 | 107.22 | 41.35 | 500.0  |
| 121.00 | 28.40 | 617.4 | 113.22 | 41.87 | 620.0  |
| 121.00 | 28.37 | 303.6 | 114.58 | 41.08 | 300.0  |
| 121.02 | 28.38 | 622.5 | 114.30 | 41.88 | 550.0  |
| 88.88  | 29.25 | 39.7  | 114.03 | 41.02 | 430.0  |
| 89.78  | 29.38 | 32.1  | 117.93 | 41.78 | 280.0  |
| 91.90  | 29.95 | 54.5  | 118.93 | 41.50 | 489.0  |
| 91.15  | 29.63 | 61.7  | 120.23 | 41.00 | 526.9  |
| 91.78  | 29.88 | 32.4  | 121.40 | 41.55 | 1000.0 |
| 100.38 | 29.70 | 109.7 | 124.20 | 41.62 | 429.0  |
| 103.53 | 29.75 | 565.0 | 86.90  | 42.37 | 79.9.0 |
| 103.65 | 29.30 | 571.8 | 89.20  | 42.93 | 36.0   |
| 109.73 | 29.40 | 414.0 | 117.97 | 42.52 | 120.0  |
| 110.77 | 29.93 | 550.0 | 118.62 | 42.03 | 600.0  |
| 111.30 | 29.48 | 325.3 | 119.13 | 42.27 | 401.0  |
| 112.75 | 29.92 | 226.0 | 124.70 | 42.57 | 283.5  |
| 113.37 | 29.67 | 342.3 | 128.05 | 42.05 | 189.8  |
| 115.20 | 29.83 | 644.8 | 81.88  | 43.13 | 93.0.0 |
| 118.60 | 29.43 | 346.3 | 88.12  | 43.88 | 120.4  |
| 121.75 | 29.80 | 519.0 | 88.32  | 43.35 | 78.9   |
| 121.30 | 29.40 | 520.7 | 94.35  | 43.08 | 93.4   |
| 81.25  | 30.28 | 47.0  | 94.07  | 43.08 | 70.0   |
| 106.72 | 30.03 | 371.9 | 116.25 | 43.75 | 350    |
| 108.27 | 30.2  | 326.9 | 127.08 | 43.13 | 126.6  |
| 110.98 | 30.43 | 630.4 | 129.30 | 43.73 | 181.5  |
| 115.85 | 30.23 | 515.1 | 131.07 | 43.15 | 335.0  |
| 115.02 | 30.25 | 360.0 | 85.32  | 44.35 | 240.0  |
| 116.63 | 30.95 | 487.9 | 93.30  | 44.20 | 16.6   |
| 118.15 | 30.08 | 335.0 | 120.98 | 44.37 | 196.3  |
| 119.60 | 30.45 | 682.1 | 126.73 | 44.68 | 241.1  |
| 119.38 | 30.38 | 584.7 | 128.97 | 44.05 | 154.5  |
| 90.02  | 31.37 | 44.9  | 90.53  | 45.37 | 66.9   |
| 96.98  | 31.18 | 55.3  | 121.33 | 45.63 | 350.0  |
| 104.13 | 31.37 | 440.3 | 122.20 | 45.78 | 335.0  |
| 106.72 | 31.65 | 477.1 | 123.23 | 45.58 | 89.5   |
| 111.63 | 31.07 | 417.9 | 126.77 | 45.75 | 99.1   |
| 115.57 | 31.20 | 430.0 | 127.32 | 45.10 | 480.0  |
| 115.57 | 31.20 | 356.1 | 84.38  | 46.77 | 122.1  |



|        |       |       |        |       |       |
|--------|-------|-------|--------|-------|-------|
| 119.95 | 31.77 | 166.0 | 84.38  | 46.77 | 97.5  |
| 121.38 | 31.35 | 581.3 | 133.15 | 46.25 | 162.4 |
| 121.43 | 31.17 | 278.0 | 123.18 | 47.33 | 191.8 |
| 80.08  | 32.50 | 34.6  | 123.50 | 47.93 | 201.6 |
| 84.07  | 32.30 | 36.3  | 86.35  | 48.05 | 54.0  |
| 96.57  | 32.13 | 61.9  | 122.73 | 48.02 | 174.8 |
| 102.38 | 32.25 | 44.2  | 125.98 | 48.07 | 220.7 |
| 105.47 | 32.30 | 418.5 | 127.65 | 48.47 | 239.1 |
| 105.20 | 32.05 | 578.5 | 128.72 | 48.03 | 140.5 |
| 106.05 | 32.52 | 307.9 | 128.25 | 48.03 | 114.7 |
| 106.08 | 32.12 | 371.7 | 128.68 | 48.30 | 214.4 |
| 108.27 | 32.20 | 450.5 | 118.12 | 49.28 | 138.0 |
| 111.48 | 32.17 | 581.4 | 121.05 | 49.10 | 164.8 |
| 113.98 | 32.42 | 431.5 | 125.37 | 50.07 | 144.9 |
| 115.73 | 32.30 | 202.9 | 126.97 | 50.58 | 183.8 |
| 118.42 | 32.67 | 653.0 | 122.37 | 53.48 | 129.9 |

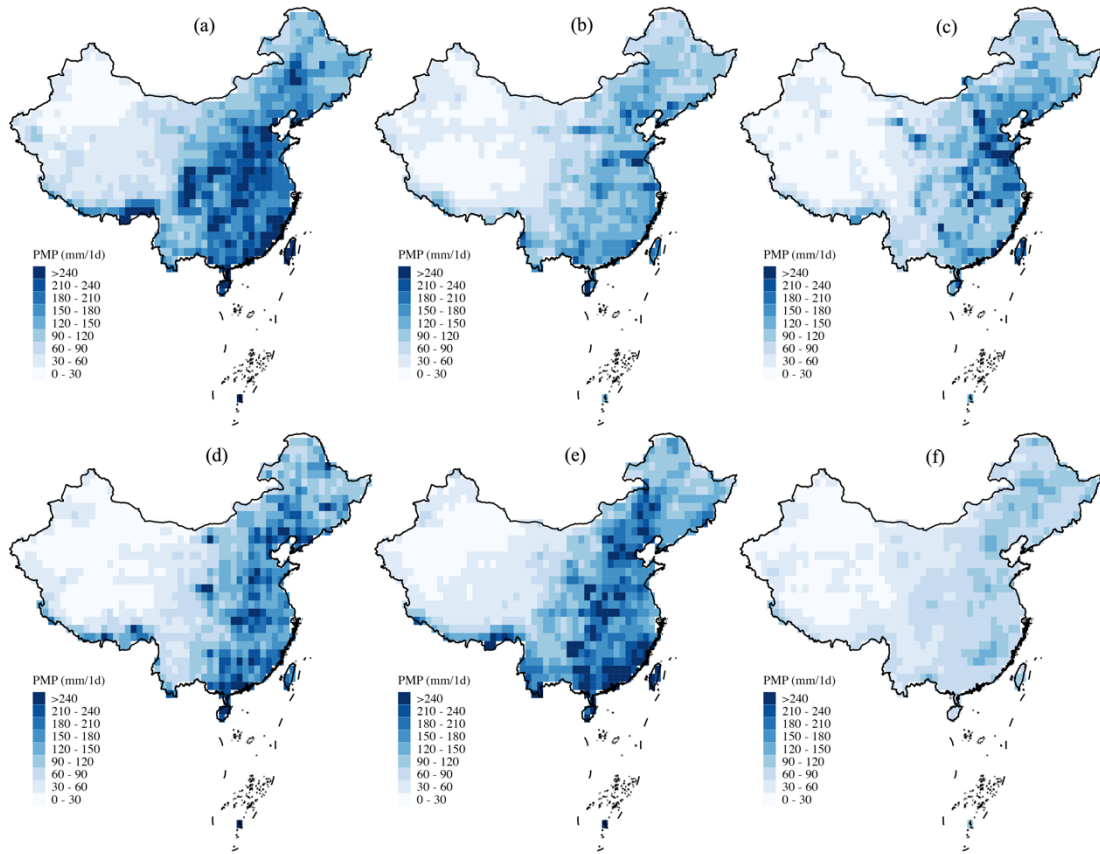

Figure S1. Spatial distribution of 1d PMP estimates during 1980-2014 over China from the (a) CMCC-ESM2, (b) CNRM-CM6-1, (c) EC-Earth3, (d) IPSL-CM6A-LR, (e) MIROC6, and (f) MPI-ESM1-2-LR models of the CMIP experiment, respectively.

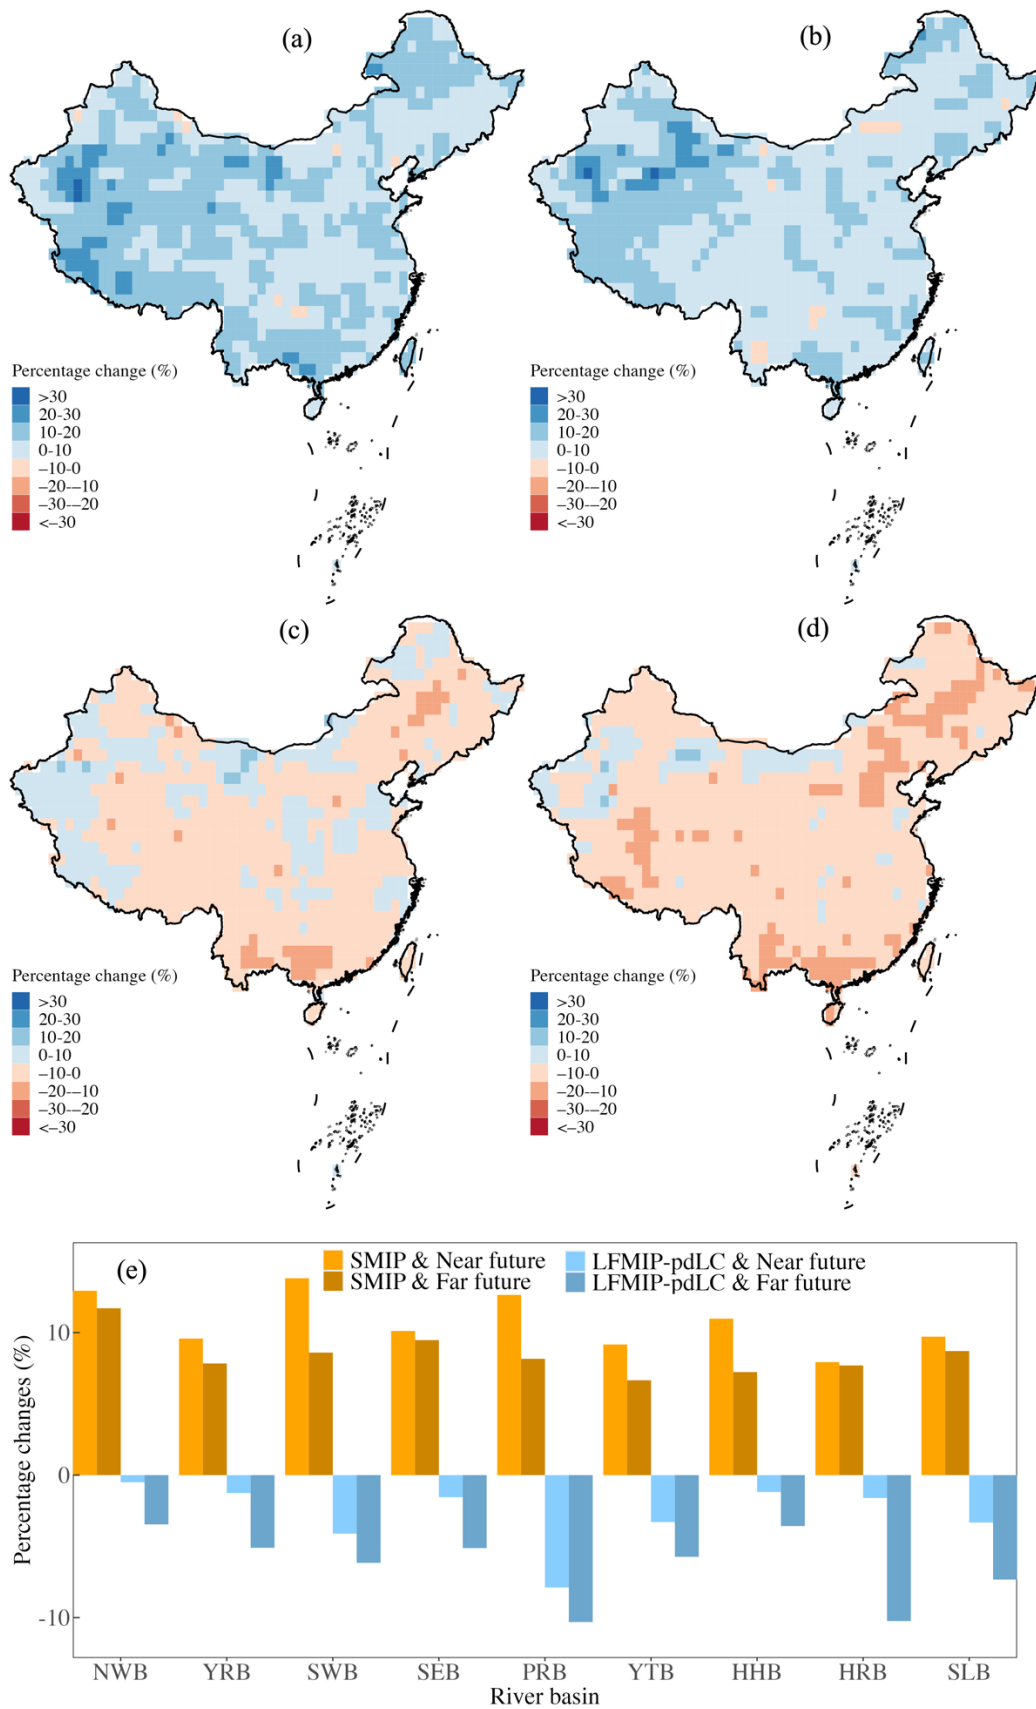

Figure S2. Multi-model mean percentage changes in 1d  $X'_n$  from (a, c) 2030-2064 and (b, d) 2065-2099 period to 1980-2014 under SSP126 scenario over China from (a, b) SMIP and (c, d) LFMIP-pdLC ensembles. (e) Regional summary of the percentage changes in 1d  $X'_n$ . Please refer to Figure 1 for more details on the regional abbreviations.

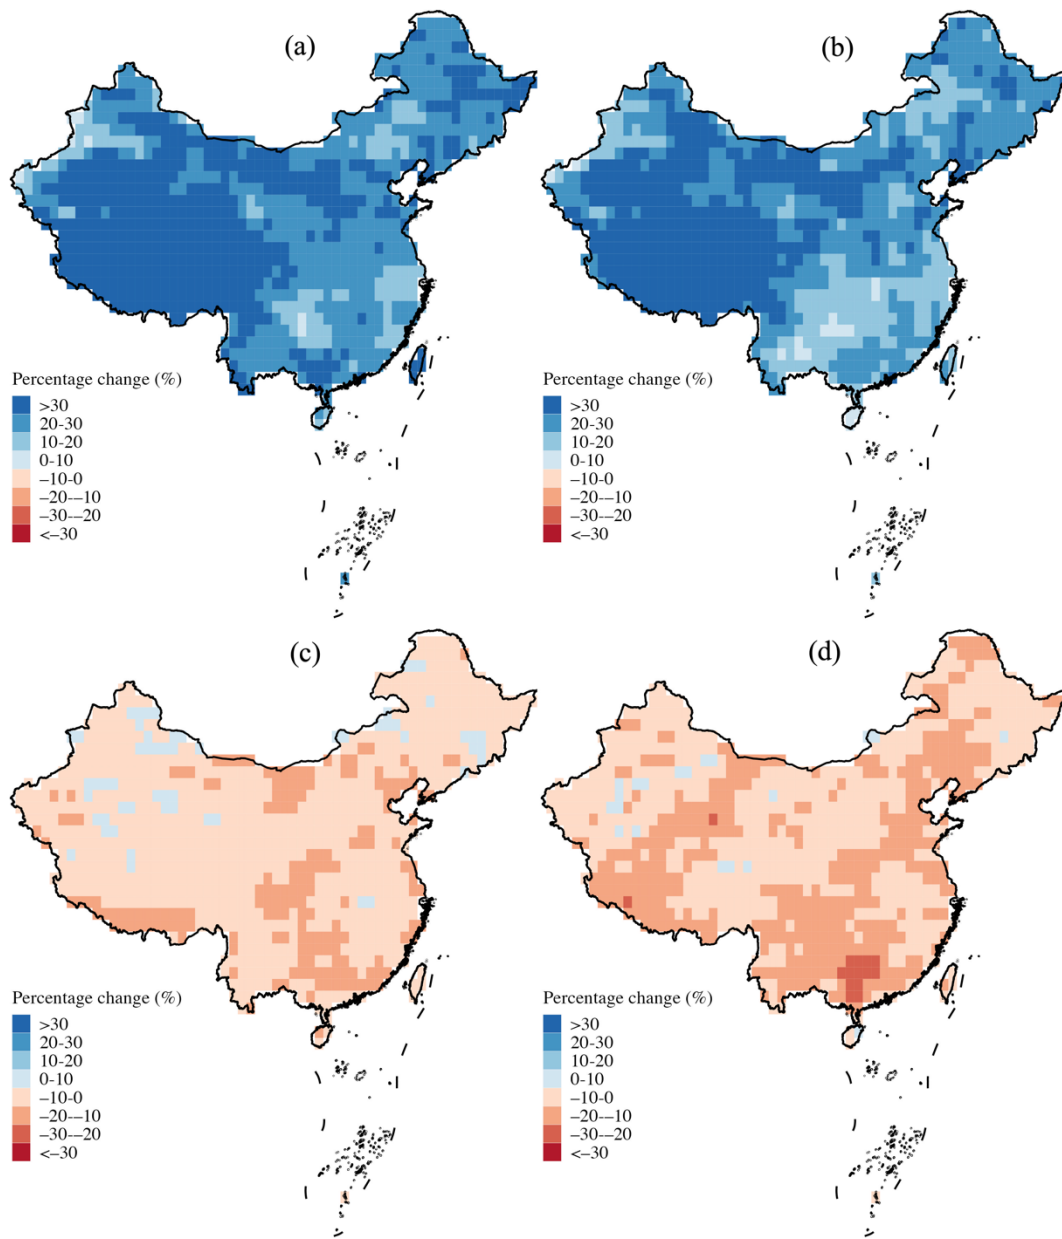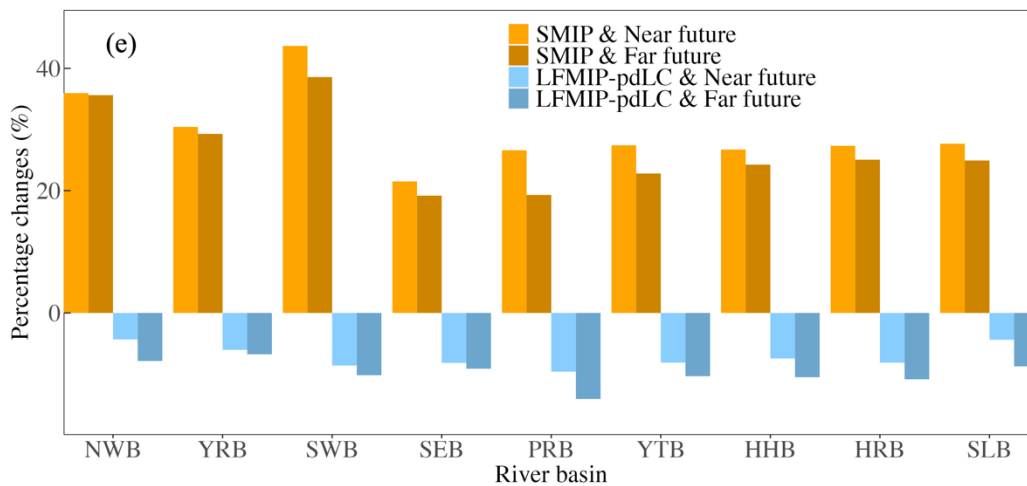

Figure S3. Same as Figure S2, but for the SSP585 scenario.

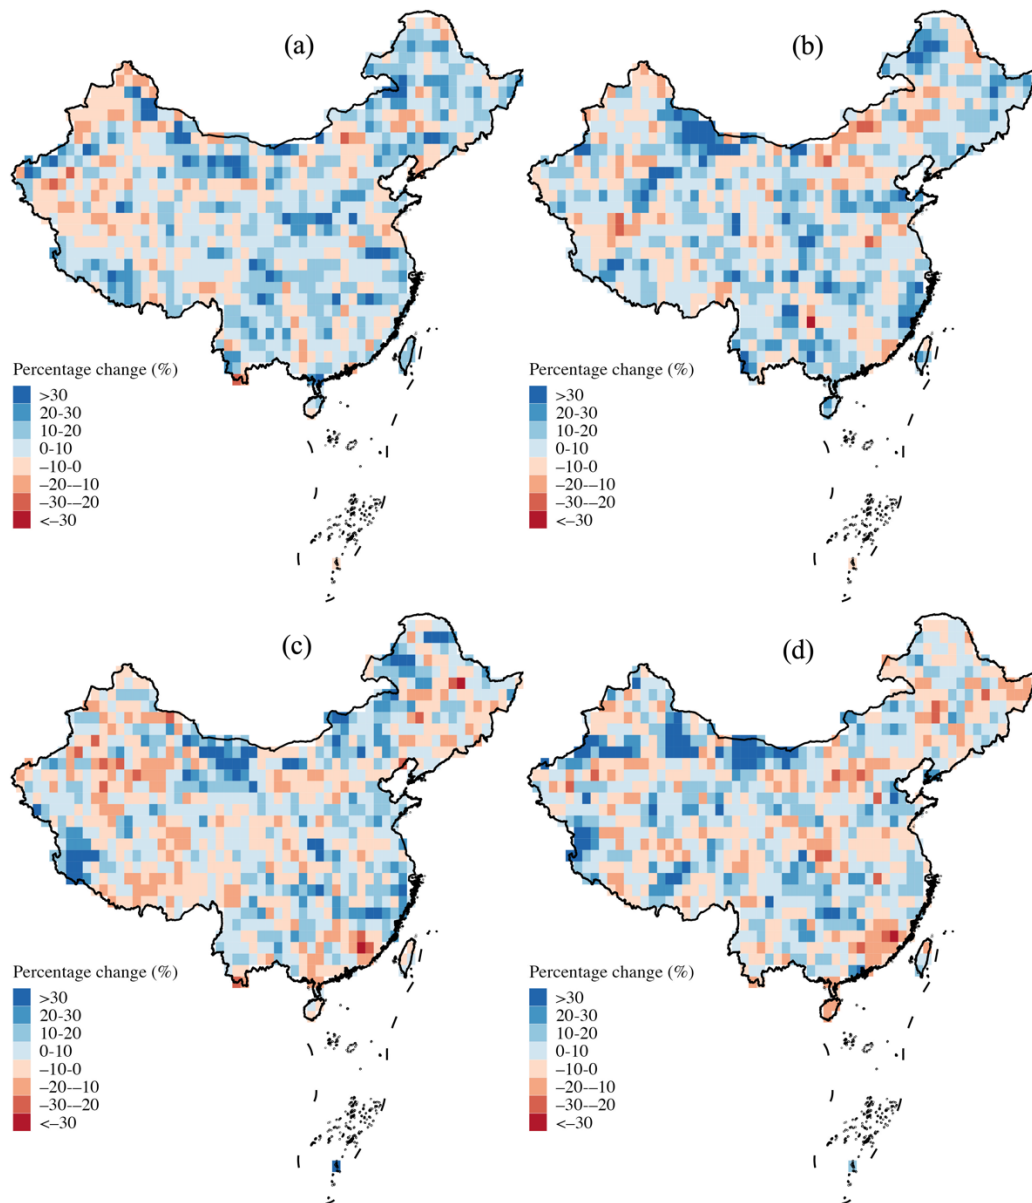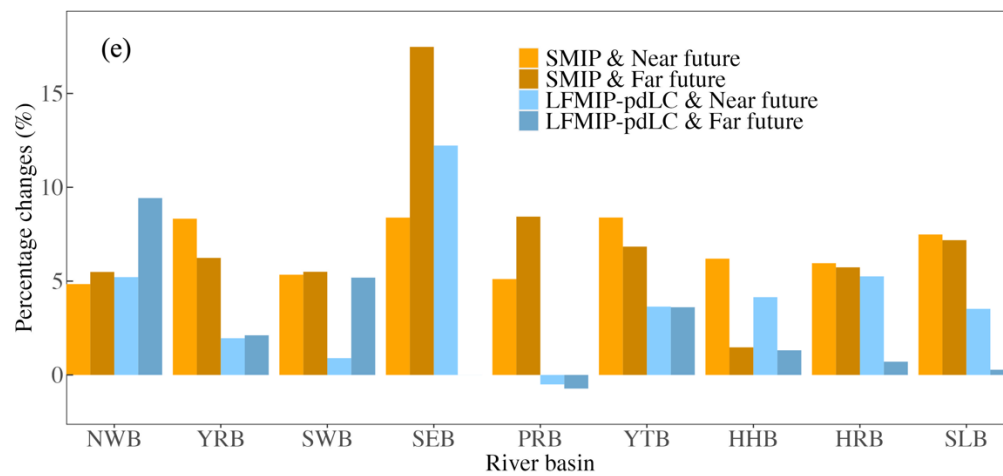

Figure S4. Multi-model mean percentage changes in  $1d K$  factor from (a, c) 2030-2064 and (b, d) 2065-2099 period to 1980-2014 under SSP126 scenario over China from (a, b) SMIP and (c, d) LFMIP-pdLC ensembles. (e) Regional summary of the percentage changes in  $1d K$  factor. Please refer to Figure 1 for more details on the regional abbreviations.

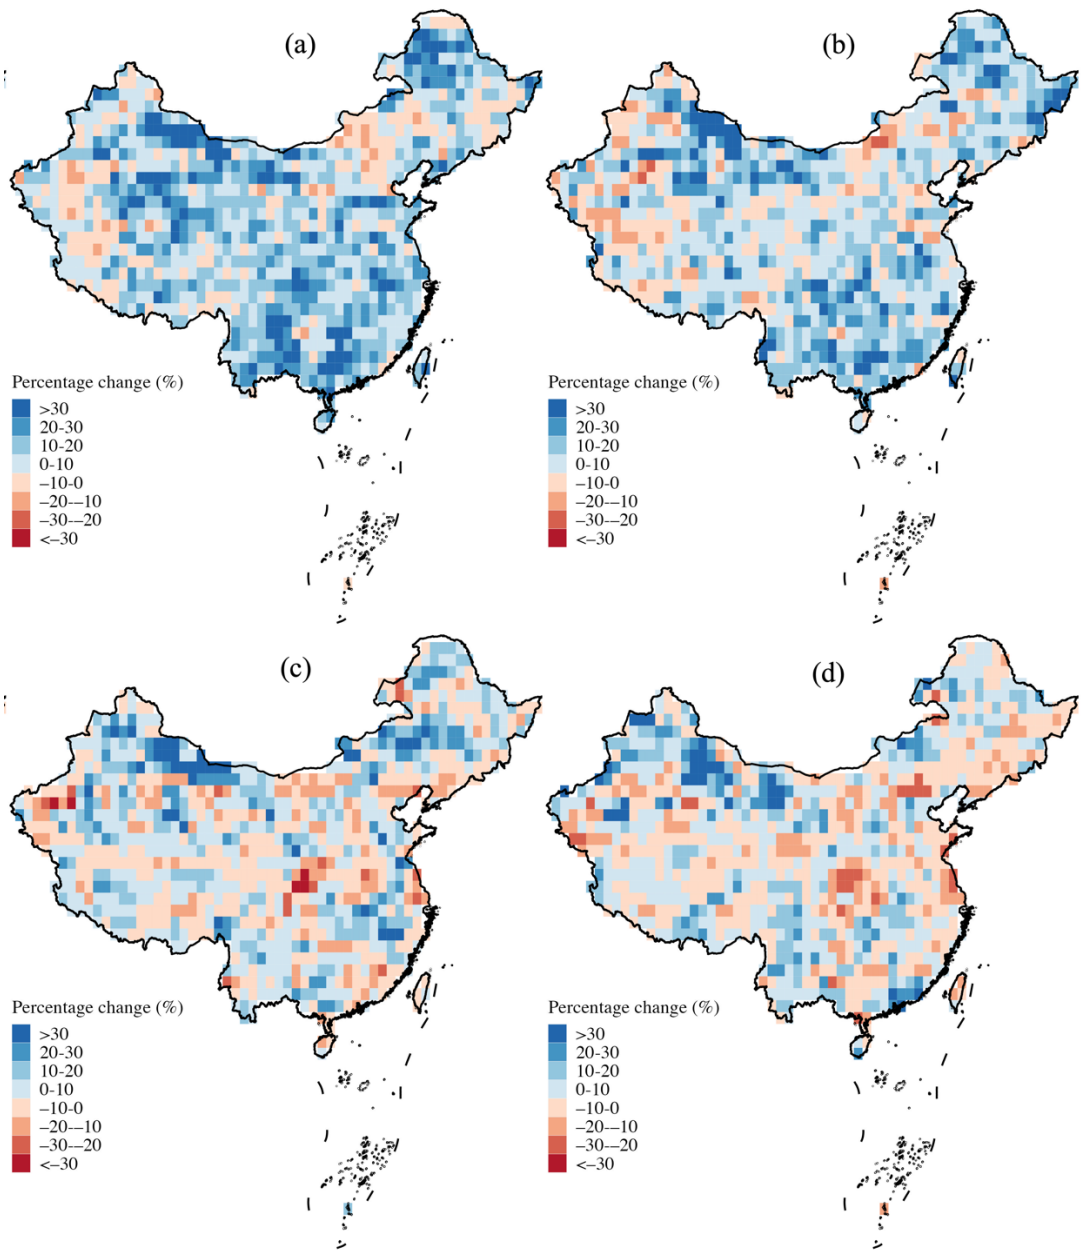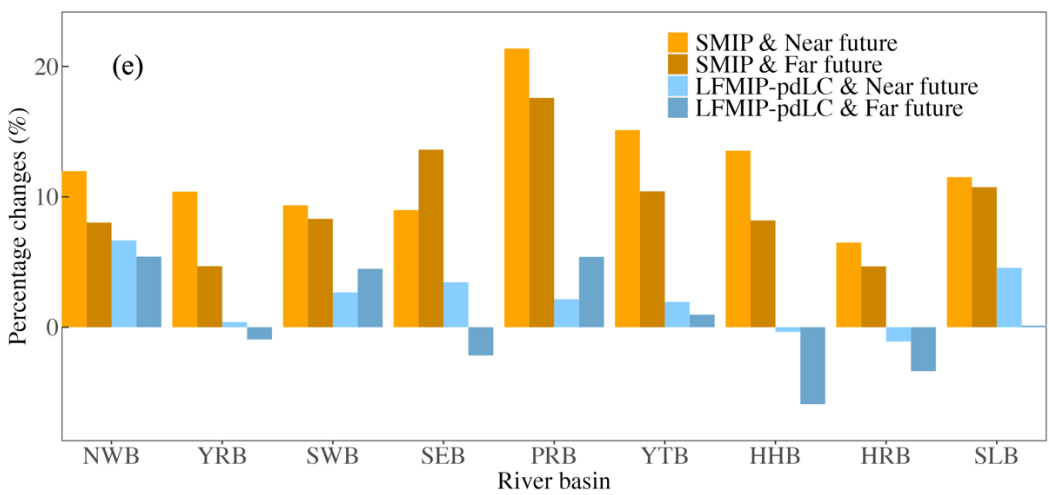

Figure S5. Same as Figure S4, but for the SSP585 scenario.

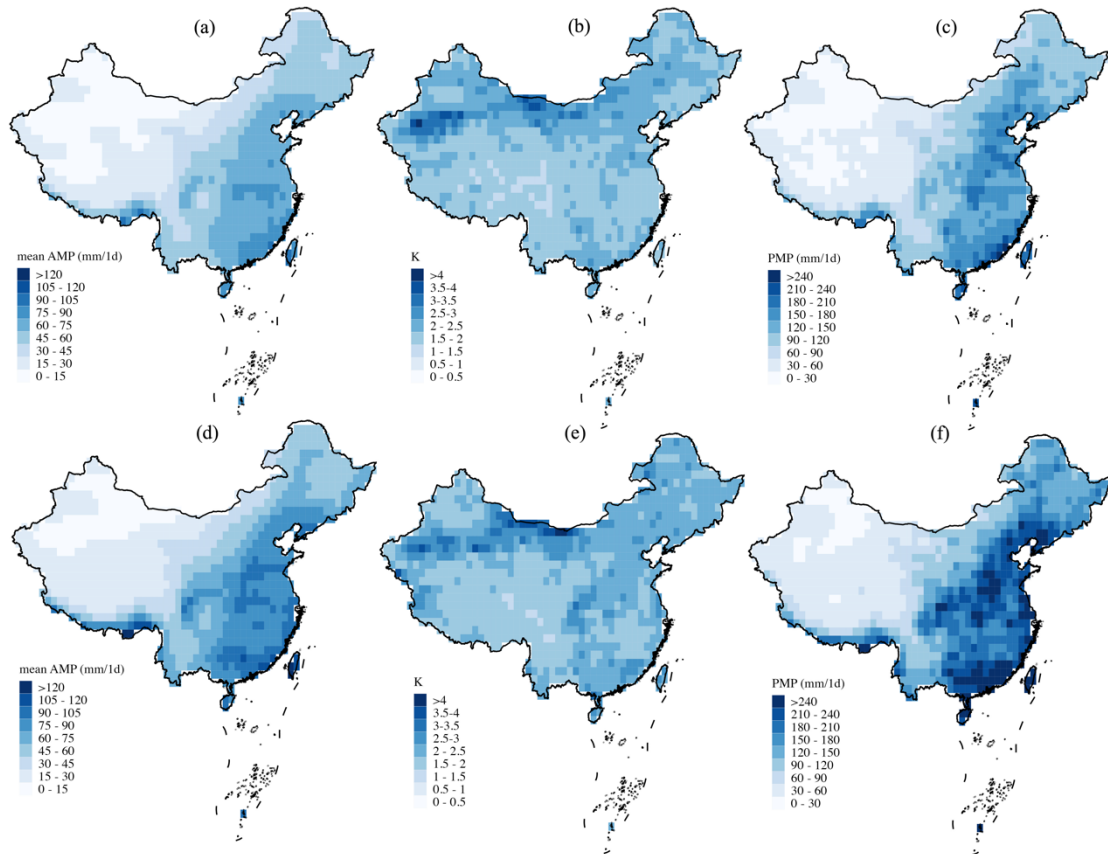

Figure S6. Estimates of 1d (a, d)  $X'_n$ , (b, e)  $K$  factor, and (c, f) PMP from ensemble mean of the (upper panel) CMIP and (lower panel) LFMIP-pdLC experiments during 1980-2014 over China.

Reference:

General Institute of Water Conservancy and Hydropower Planning and Design. (1982, 1990). Ministry of Water Resources Compilation of hydrological calculations of national large and medium-sized water conservancy and hydropower projects. Beijing.

Wang, J. Q. (2002). Rainstorms in China. China Water & Power Press, Beijing.
